# Supplementary material
Source: PubMed Central journal article supplement (PMC299809)

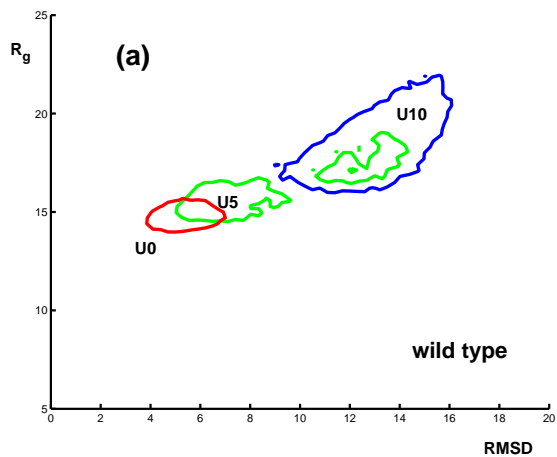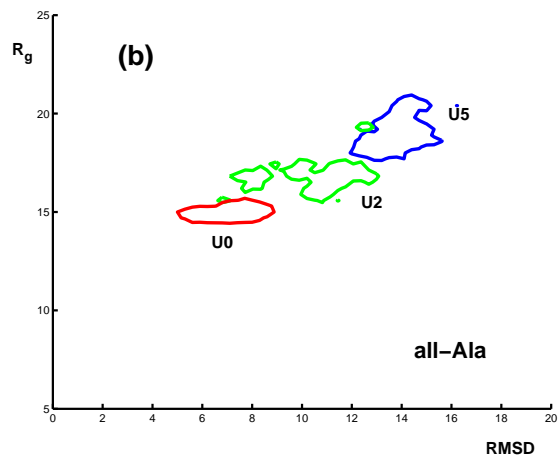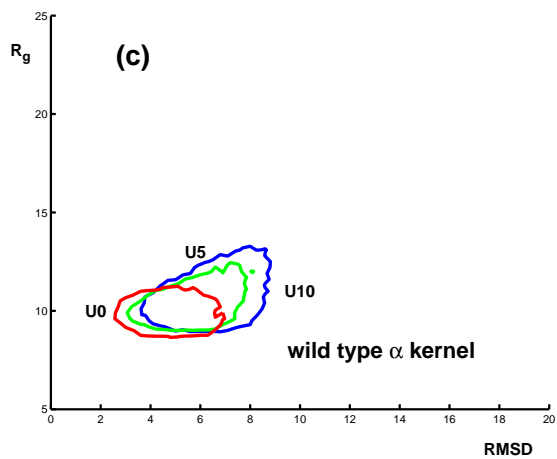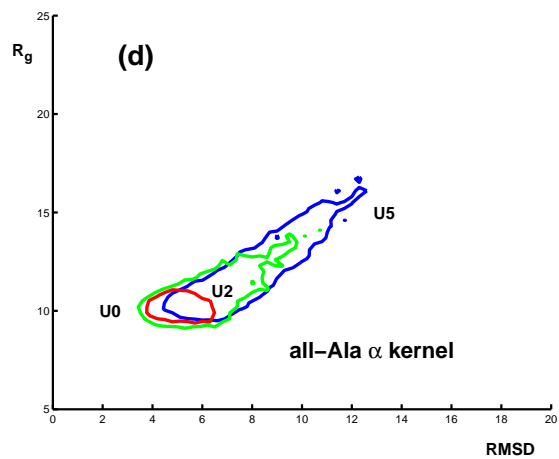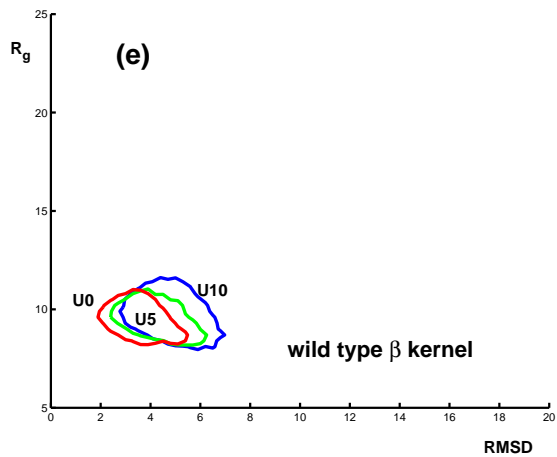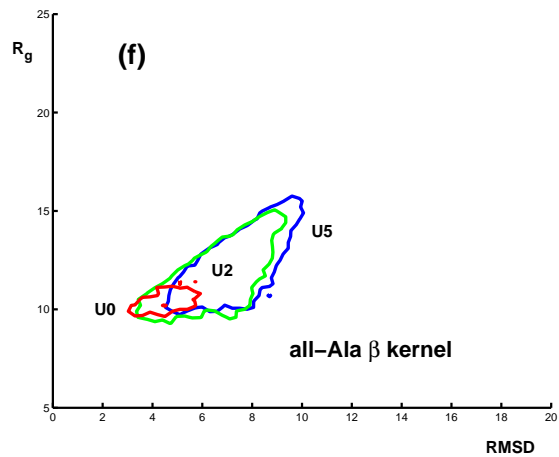

Supplement: pnas_100_25_14817__2.pdf [file pnas_100_25_14817__2.pdf]

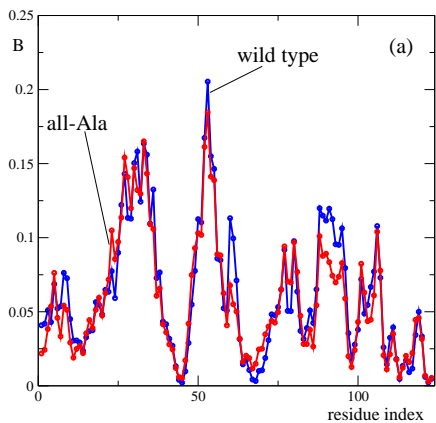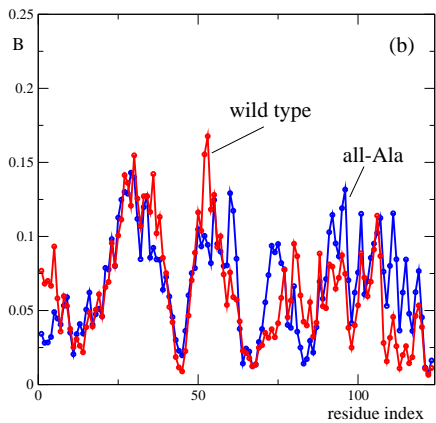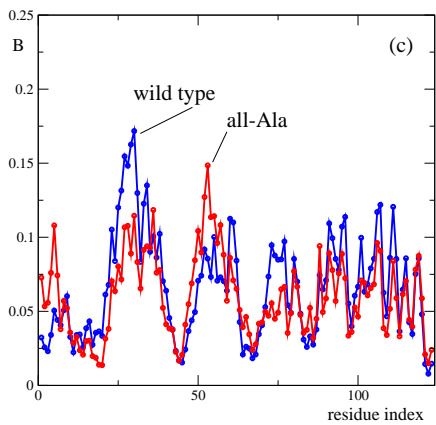

Supplement: pnas_100_25_14817__4.pdf [file pnas_100_25_14817__4.pdf]
